# Supplementary material for: Fabrication of g-C3N4/Bi2WO6 as a direct Z-scheme excellent photocatalyst
Source: Royal Society of Chemistry journal article supplement (doi:10.1039/d1nj06034a), 2022-01-01
Supplement: d1nj06034a1.pdf [file d1nj06034a1.pdf]

Support Information

## Fabrication of g-C<sub>3</sub>N<sub>4</sub>/Bi<sub>2</sub>WO<sub>6</sub> as direct Z-scheme excellent photocatalyst

Ping Zhao, Bo Jin\*, Qingchun Zhang, Rufang Peng\*

State Key Laboratory of Environment-friendly Energy Materials,

School of Materials Science and Engineering,

Southwest University of Science and Technology, Mianyang 621010, Sichuan, P. R. China.

Correspondence: jinbo0428@163.com; rfpeng2006@163.com

### 1. Sample preparation

**Synthesis of CNQDs:** Briefly, urea and sodium citrate (18:1) were dissolved in 1.5 mL of deionized water, and kept it at 180 °C for 3 h. The product was purified with a 0.22 μm filter membrane to remove the insoluble precipitate, and further diluted to 50 mL to prepare CNQDs suspensions (5.0 mg mL<sup>-1</sup>).

**Synthesis of CNNS:** The bulk g-C<sub>3</sub>N<sub>4</sub> was received by heating urea at 550 °C for 4 h. Then, 4 g of bulk g-C<sub>3</sub>N<sub>4</sub> was dispersed in 200 mL water and exfoliated by ultrasonication for 2 h. The suspension was centrifuged at 3000 rpm to remove the residual unexfoliated g-C<sub>3</sub>N<sub>4</sub> particles, and ultrasound again. The final product was obtained after the suspension was centrifuged at 10000 rpm, lyophilized, and noted as CNNS.

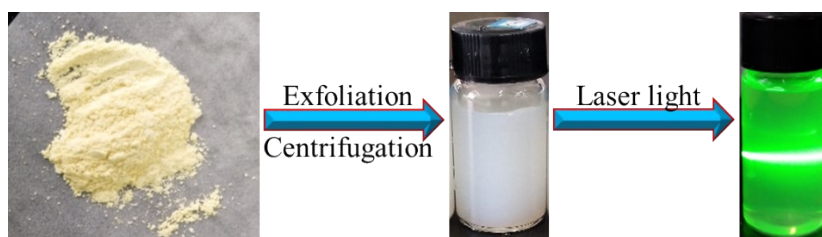

Fig. S1 Photograph of bulk  $g\text{-C}_3\text{N}_4$  and suspension of ultrathin  $g\text{-C}_3\text{N}_4$  nanosheets

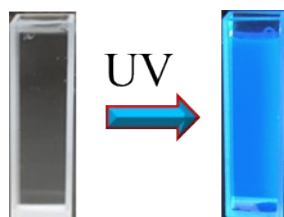

Fig. S2 Photos of CNQDs solution under sunlight (left) and irradiation by a 365 nm UV beam (right).

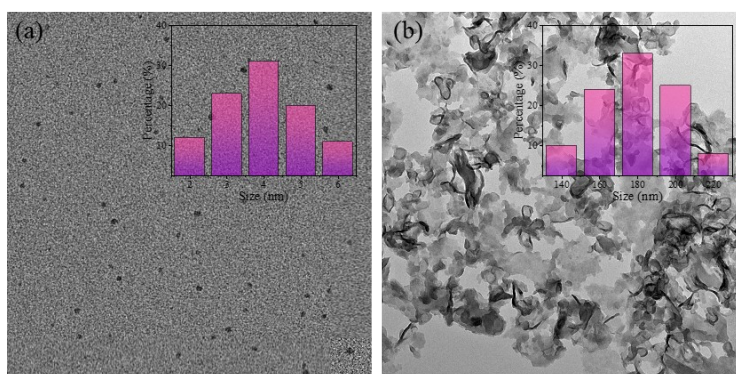

Fig. S3 TEM images of the as-prepared (a) CNQDs and (b) CNNS. Inset: the corresponding size distribution.

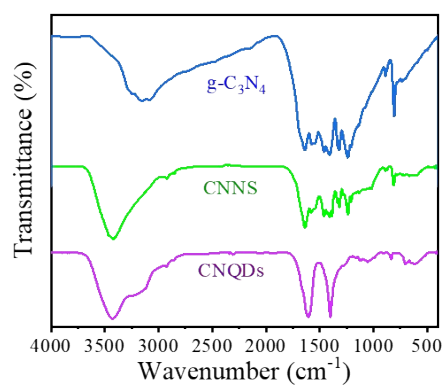

Fig. S4 FT-IR spectra for as-prepared  $g\text{-C}_3\text{N}_4$ , CNNS and CNQDs

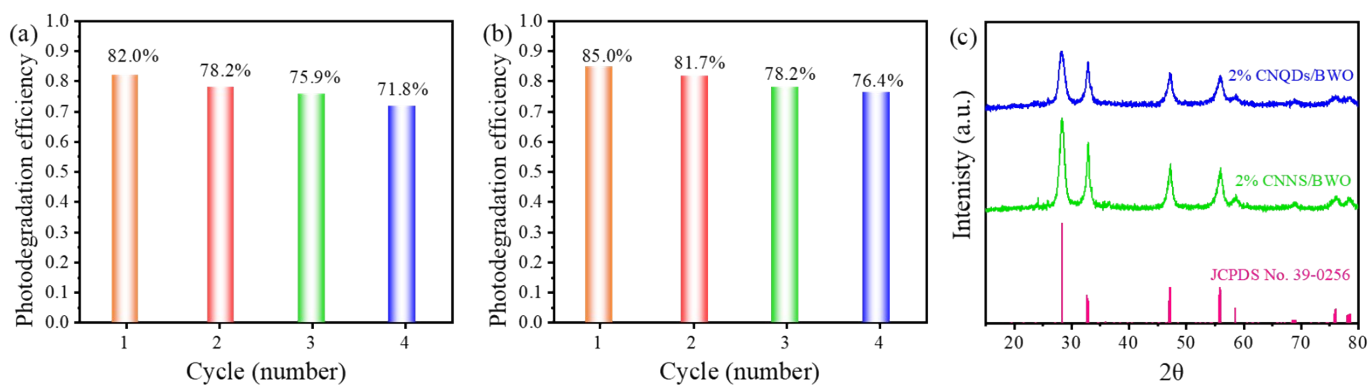

Fig. S5 Four continuous cycle experiments of (a) 2% CNQDs/BWO, and (b) 2% CNNS/BWO for CIP degradation under the same conditions; (c) the XRD pattern of as-prepared samples before and after photocatalytic experiment

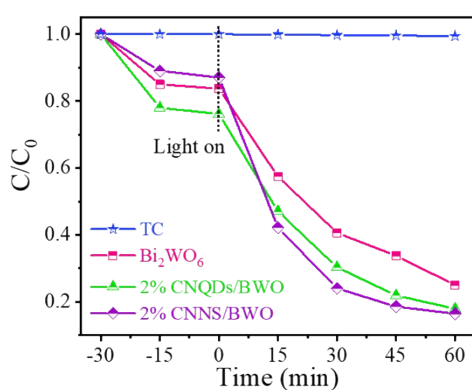

Fig. S6 Photocatalytic degradation of TC of as-prepared photocatalysts.

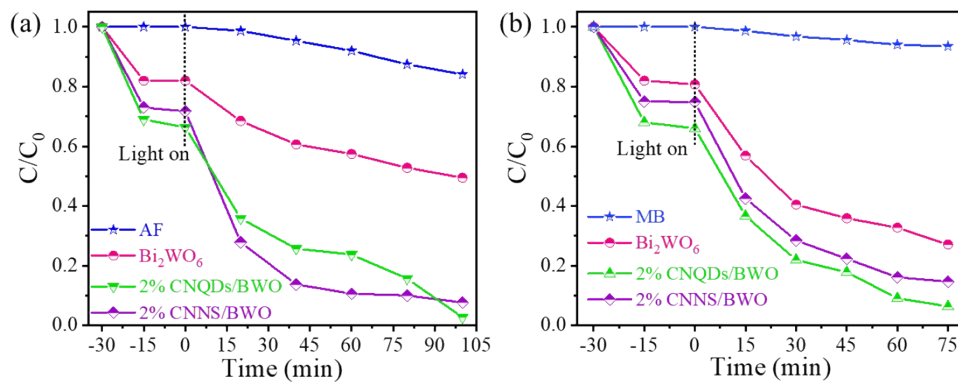

Fig. S7 Photocatalytic degradation of (a) AF and (b) MB of as-prepared photocatalysts.

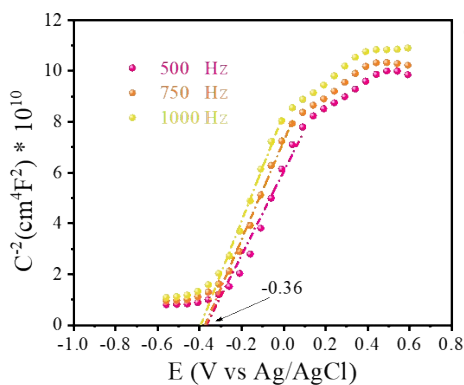

Fig. S8 Mott-Schottky tests of  $\text{Bi}_2\text{WO}_6$
